# Supplementary material for: The incredible story of ophiobolin A and sphaeropsidin A: two fungal terpenes from wilt-inducing phytotoxins to promising anticancer compounds
Source: Royal Society of Chemistry journal article supplement (doi:10.1039/d3np00035d), 2023-12-22
Supplement: d3np00035d1.pdf [file d3np00035d1.pdf]

## Supplementary information

### **The incredible story of the ophiobolin A and sphaeropsidin A: Two fungal terpenoids from wilt-inducing phytotoxins to promising anticancer compounds**

Antonio Evidente<sup>\*a,b</sup>

Institute of Sciences of Food Production, National Research Council, Via Amendola 122/O, 70125 Bari Italy

Content

Table 1

Table 2

**Table 1** Ophiobolin A, its natural and analogs (“: identical data to the entry immediately above)

| First subgroup                                     |                                                                                           |                                                                                                     |                |
|----------------------------------------------------|-------------------------------------------------------------------------------------------|-----------------------------------------------------------------------------------------------------|----------------|
| Compound                                           | Fungal producer                                                                           | Activity                                                                                            | Ref.           |
| Ophiobolin A ( <b>1</b> , OPhA)                    | <i>Ophiobolus miyabeanus</i>                                                              | Phytotoxic                                                                                          | 15             |
|                                                    | <i>Helminthosporium orizae</i>                                                            | Not reported                                                                                        | 17             |
|                                                    | <i>Bipolaris</i> and <i>Aspergillus Drechslera</i> genera                                 | Other biological activities                                                                         | 5              |
|                                                    | <i>Drechslera gigantea</i>                                                                | Phytotoxic and weed biocontrol                                                                      | 51             |
|                                                    | <i>Helminthosporium gramineum</i> subsp. <i>echinochloae</i> and <i>Curvularia lunata</i> | “                                                                                                   | 52             |
|                                                    |                                                                                           | Anticancer                                                                                          | 54, 55, 56, 57 |
|                                                    | <i>H. gramineum</i>                                                                       | Inhibitors of calmodulin                                                                            | 37             |
|                                                    |                                                                                           | Antiproliferative                                                                                   | 53             |
|                                                    |                                                                                           | Antifungal                                                                                          | 44             |
|                                                    | <i>Helminthosporium sp.</i>                                                               | Inhibition of photosynthesis                                                                        | 63             |
|                                                    | <i>Bipolaris sorghicola</i>                                                               | Phytotoxic                                                                                          | 64             |
|                                                    | <i>Drechslera maydis</i>                                                                  | “                                                                                                   | 66             |
|                                                    | <i>Cochliobolus heterostrophus</i>                                                        | Not reported                                                                                        | 69             |
|                                                    | <i>Aspergillus</i> section <i>Usti</i>                                                    | Cytotoxic and antimalarial                                                                          | 71             |
|                                                    |                                                                                           | Cytotoxic                                                                                           | 77             |
| Ophiobolin B ( <b>3</b> , SphB)                    | <i>O. miyabeanus</i>                                                                      | Not reported                                                                                        | 17             |
|                                                    | <i>D. gigantea</i>                                                                        | Phytotoxic                                                                                          | 51             |
|                                                    | <i>C. heterostrophus</i>                                                                  | Not reported                                                                                        | 71             |
|                                                    | <i>Aspergillus</i> section <i>Usti</i>                                                    | Cytotoxic                                                                                           | 77             |
| 6- <i>epi</i> -ophiobolin A ( <b>4</b> )           | <i>D. gigantea</i>                                                                        | Phytotoxic                                                                                          | 50             |
|                                                    | <i>Helminthosporium sp.</i>                                                               | Inhibition of photosynthesis                                                                        | 63             |
|                                                    | <i>Bipolaris sorghicola</i>                                                               | Phytotoxic                                                                                          | 64             |
|                                                    | <i>D. maydis</i>                                                                          | “                                                                                                   | 66             |
|                                                    | <i>C. heterostrophus</i>                                                                  | Not reported                                                                                        | 71             |
| 3-Anhydro-6- <i>epi</i> -ophiobolin A ( <b>5</b> ) | <i>D. gigantea</i>                                                                        | Phytotoxic                                                                                          | 50             |
|                                                    | <i>Helminthosporium sp.</i>                                                               | Inhibition of photosynthesis                                                                        | 63             |
|                                                    | <i>Bipolaris sorghicola</i>                                                               | Phytotoxic                                                                                          | 64             |
|                                                    | <i>D. maydis</i>                                                                          | “                                                                                                   | 66             |
|                                                    | <i>C. heterostrophus</i>                                                                  | Not reported                                                                                        | 71             |
|                                                    | <i>Bipolaris sp.</i>                                                                      | Inhibition of HMG-CoA<br>Inhibition of lipopolysaccharide (LPS)-<br>induced nitric oxide production | 85             |
| Ophiobolin I ( <b>6</b> )                          | <i>D. gigantea</i>                                                                        | No toxic                                                                                            | 50             |
|                                                    | <i>C. heterostrophus</i>                                                                  | Not Reported                                                                                        | 71             |
| Ophiobolin J ( <b>7</b> )                          | <i>D. gigantea</i>                                                                        | Phytotoxic                                                                                          | 51             |
|                                                    | <i>Drechslera orizae</i>                                                                  | “                                                                                                   | 66             |
|                                                    | <i>Bipolaris sp.</i>                                                                      | Inhibition of HMG-CoA<br>Inhibition of lipopolysaccharide (LPS)-<br>induced nitric oxide production | 85             |
| Ophiobolin E ( <b>8</b> )                          | <i>D. gigantea</i>                                                                        | Not toxic                                                                                           | 51             |
| 8- <i>epi</i> -Ophiobolin J ( <b>9</b> )           | <i>D. gigantea</i>                                                                        | Not toxic                                                                                           | 51             |
|                                                    | <i>Bipolaris sp.</i>                                                                      | Inhibition of HMG-CoA<br>Inhibition of lipopolysaccharide (LPS)-<br>induced nitric oxide production | 85             |
| Ophiobolin C ( <b>10</b> , SphC)                   | <i>Bipolaris zizanie</i>                                                                  | Not reported                                                                                        | 58             |
|                                                    | <i>D. maydis</i>                                                                          | Phytotoxic                                                                                          | 66             |
|                                                    | <i>Aspergillus</i> section <i>Usti</i>                                                    | Cytotoxic                                                                                           | 77             |
|                                                    | <i>Aspergillus flocculosus</i>                                                            | “                                                                                                   | 80             |
| Ophiobolin D ( <b>11</b> )                         | <i>Cephalosporium caerulens.</i>                                                          | “                                                                                                   | 59,60          |
| Ophiobolin F ( <b>12</b> )                         | <i>B. maydis</i>                                                                          | “                                                                                                   | 61             |

|                                                               |                                           |                                         |       |
|---------------------------------------------------------------|-------------------------------------------|-----------------------------------------|-------|
|                                                               |                                           | "                                       | 77    |
| Ophiobolin A lactone (13)                                     | <i>Cochliobolus miyabeanus</i>            | Not reported                            | 62    |
|                                                               | <i>C. heterostrophus</i>                  | Not reported                            | 69    |
| 3-Anhydrophiobolin A (14)                                     | <i>Heliminthosporium sp.</i>              | Inhibition of photosynthesis            | 31    |
|                                                               | <i>B. sorghicola</i>                      | Phytotoxic                              | 64    |
|                                                               | <i>D. maydis</i>                          | "                                       | 66    |
|                                                               | <i>C. heterostrophus</i>                  | Not Reported                            | 69    |
|                                                               | <i>Aspergillus sp.</i>                    | "                                       | 71    |
| Ophiobolin G (15)                                             | <i>Aspergillus ustus</i>                  | Antibiotic                              | 87    |
|                                                               |                                           | Not reported                            | 65    |
|                                                               |                                           | "                                       | 64    |
|                                                               | "                                         | Cytotoxic                               | 79    |
| Ophiobolin H (16)                                             | <i>A. ustus</i>                           | Antibiotic                              | 64,65 |
|                                                               | <i>A. section Usti</i>                    | Cytotoxic                               | 77    |
|                                                               | <i>A. ustus</i>                           | "                                       | 79    |
|                                                               | <i>Aspergillus sp.</i>                    | Not reported                            | 87    |
|                                                               |                                           | Cytotoxic                               | 80    |
| 25-Hydroxyphiobolin I (17)                                    | <i>D. sorghicola</i> and <i>D. maydis</i> | Phytotoxic                              | 66    |
| 6- <i>epi</i> -Ophiobolin I (18)                              | <i>D. orizae</i>                          | "                                       | 67    |
|                                                               | <i>A. ustus</i>                           | Cytotoxic                               | 79    |
| 8-Deoxyphiobolin J (19)                                       | "                                         | "                                       | "     |
| Ophiobolin K (20)                                             | <i>A. ustus</i>                           | Nematocidal                             | 68    |
|                                                               | <i>A. section Usti</i>                    | Cytotoxic                               | 77    |
|                                                               | <i>A.ustus</i>                            | "                                       | 79    |
|                                                               | <i>Aspergillus sp.</i>                    | Not reported                            | 80    |
| 6- <i>epi</i> -Ophiobolin K (21)                              | "                                         | "                                       | "     |
| Ophiobolin L (22)                                             | <i>C. heterostrophus</i>                  | Not reported                            | 69    |
| 6- <i>epi</i> -Ophiobolin L (23)                              | "                                         | "                                       | "     |
| Ophiobolin B lactone (24)                                     | "                                         | "                                       | "     |
| Ophiobolin M (25)                                             | "                                         | Nematocidal activity                    | 70    |
| 6- <i>epi</i> -Ophiobolin M (26)                              | "                                         | "                                       | "     |
| 6- <i>epi</i> -Ophiobolin C (27)                              | "                                         | "                                       | "     |
| 18,19-Dihydrophiobolin C (28)                                 | "                                         | "                                       | "     |
| 6- <i>epi</i> -3-Anhydrophobolin B (29)                       | "                                         | Not reported                            | 71    |
| 6- <i>epi</i> -Ophiobolin N (30)                              | <i>Emericella varicolor</i>               | Not reported                            | 72    |
|                                                               | <i>A. section Usti</i>                    | "                                       | 77    |
|                                                               | <i>Aspergillus insuetus</i>               | Antibiotic                              | 81    |
|                                                               | <i>Aspergillus sp.</i>                    | Cytotoxic                               | 87    |
|                                                               | <i>Aspergillus flocculosus</i>            | "                                       | 80    |
| 6- <i>epi</i> -Ophiobolin G (31)                              | <i>E. varicolor</i>                       | Not reported                            | 72    |
|                                                               | <i>A. section Usti</i>                    | "                                       | 77    |
|                                                               | <i>A. insuetus</i>                        | Antibiotic                              | 81    |
|                                                               | <i>Apergillus sp.</i>                     | Cytotoxic                               | 87    |
|                                                               | <i>A. flocculosus</i>                     | "                                       | 80    |
| 5 $\alpha$ ,6 $\alpha$ -Ophiobolin H (32)                     | <i>A. ustus</i>                           | Not reported                            | 74    |
|                                                               | "                                         | "                                       | 78    |
|                                                               | <i>A. insuetus</i>                        | Antibiotic                              | 81    |
|                                                               | <i>Aspergillus sp.</i>                    | Not reported                            | 87    |
| 5- <i>O</i> -Methyl-5 $\alpha$ ,6 $\alpha$ -ophiobolin H (33) | <i>A. ustus</i>                           | Not reported                            | 74    |
| 5- <i>O</i> -Methylphiobolin H (34)                           | "                                         | "                                       | "     |
| (6 $\alpha$ )-21,21 <i>O</i> -Dihydrophiobolin G (35)         | <i>A. ustus</i>                           | "                                       | "     |
|                                                               | <i>A. insuetus</i>                        | "                                       | 74    |
|                                                               | <i>A. calidoustus</i>                     | "                                       | 81    |
|                                                               | <i>Aspergillus sp.</i>                    | Inhibition of lipopolysaccharide (LPS)- | 83    |

|                                                                             |                                |                                                                         |    |
|-----------------------------------------------------------------------------|--------------------------------|-------------------------------------------------------------------------|----|
|                                                                             |                                | induced nitric oxide productionI                                        | 87 |
| 18,19-Dihydro-18,19-dihydroxyophiobolin G (36)                              | <i>A. ustus</i>                | "                                                                       | 74 |
|                                                                             |                                |                                                                         | 78 |
|                                                                             | <i>A. insuetus</i>             | "                                                                       | 81 |
| Ophiobolin O (37)                                                           | <i>A. ustus</i>                | Antiproliferative                                                       | 75 |
| Ophiobolin P (38)                                                           | <i>Ulocladium</i> sp.          | Antibiotic                                                              | 76 |
|                                                                             | <i>Aspergillus</i> sp.         | Not reported                                                            | 87 |
| Ophiobolin Q (39)                                                           | <i>Ulocladium</i> sp.          | Not toxic                                                               | 76 |
|                                                                             | <i>Aspergillus</i> sp.         | Inhibition of lipopolysaccharide (LPS)-induced nitric oxide productionI | 87 |
| Ophiobolin R (40)                                                           | <i>Ulocladium</i> sp.          | Not toxic                                                               | 76 |
|                                                                             | <i>Aspergillus calidoustus</i> | Not reported                                                            | 83 |
| Ophiobolin S (41)                                                           | "                              | "                                                                       | "  |
| Ophiobolin T (42)                                                           | "                              | Antibiotic and cytotoxic                                                | "  |
| Ophiobolin U (43)                                                           | <i>A. section Usti</i>         | Not reported                                                            | 77 |
|                                                                             | <i>A. ustus</i>                | Antibiotic and zootoxic                                                 | 78 |
|                                                                             | <i>Aspergillus</i> sp.         | Inhibition of lipopolysaccharide (LPS)-induced nitric oxide productionI | 87 |
| Ophiobolin V (44)                                                           | <i>A. ustus</i>                | Antibiotic and zootoxic                                                 | 78 |
| Ophiobolin W (45)                                                           | "                              | "                                                                       | "  |
| (6 $\alpha$ )-21-Deoxyophiobolin G (46)                                     | "                              | "                                                                       | "  |
| (6 $\alpha$ )-16,17-Dihydro-21-deoxyophiobolin G (47)                       | "                              | "                                                                       | "  |
| Ophiobolins X, (48)                                                         | "                              | Not reported                                                            | 79 |
|                                                                             | <i>Aspergillus</i> sp.         | "                                                                       | 87 |
| Ophiobolin Y (49)                                                           | "                              | "                                                                       | "  |
| Ophiobolin Z (50)                                                           | "                              | Cytotoxic                                                               | "  |
| 21-Deoxyophiobolin K (51)                                                   | "                              | "                                                                       | "  |
| 21- <i>epi</i> -Ophiobolin O (52)                                           | "                              | "                                                                       | "  |
| 21- <i>epi</i> -Ophiobolin Z (53)                                           | "                              | "                                                                       | "  |
| 14,15-dehydro-6- <i>epi</i> -ophiobolin K (54)                              | <i>A. flocculosus</i>          | "                                                                       | 80 |
| 14,15-dehydro ophiobolin K (55)                                             | "                              | "                                                                       | "  |
| 14,15-dehydro-6- <i>epi</i> -ophiobolin G (56)                              | "                              | "                                                                       | "  |
| 14,15-dehydro-ophiobolin G (57)                                             | "                              | "                                                                       | "  |
| 14,15-dehydro-( <i>Z</i> )-14-ophiobolin G (58)                             | "                              | "                                                                       | "  |
| (6 <i>R</i> )-16,17,21,21 <i>O</i> -Tetrahydroophiobolin G (59)             | <i>A. insuetus</i> SD-512      | Antibiotic                                                              | 81 |
| (6 <i>R</i> )-16,17-Dihydroophiobolin H (60)                                | "                              | "                                                                       | "  |
| (5 <i>S</i> ,6 <i>S</i> )-16,17-Dihydroophiobolin H (61)                    | "                              | Not reported                                                            | "  |
| $\alpha$ - <i>epi</i> -18,19-Dihydro-18-methoxy-19-hydroxyophiobolin P (62) | <i>Aspergillus</i> sp.         | "                                                                       | 82 |
| $\beta$ - <i>epi</i> -18,19-Dihydro-18-methoxy-19-hydroxyophiobolin P (63)  | "                              | "                                                                       | "  |
| Ophiobolin P1 (64)                                                          | <i>A. calidoustus</i>          | "                                                                       | 83 |
| 5,6-Di- <i>epi</i> -Ophiobolin H (65)                                       | "                              | "                                                                       | "  |

#### Second subgroup

| Compound                 | Fungal producer                | Activity     | Ref. |
|--------------------------|--------------------------------|--------------|------|
| Halorosellinic acid (66) | <i>Halorosellinia oceanica</i> | Antimalarial | 84   |
| Bipolarin A (67)         | <i>Bipolaris</i> sp.           | Not reported | 85   |
| Bipolarin B (68)         | "                              | Antibiotic   | "    |

|                        |                         |                                                                                                                                                                 |    |
|------------------------|-------------------------|-----------------------------------------------------------------------------------------------------------------------------------------------------------------|----|
|                        |                         | Antimalarial                                                                                                                                                    |    |
| Bipolarin C (69)       | "                       | Not reported                                                                                                                                                    | "  |
| Bipolarin D (70)       | "                       | Antibiotic                                                                                                                                                      | "  |
|                        |                         | Antimalarial                                                                                                                                                    |    |
| Bipolarin E (71)       | "                       | Antibiotic                                                                                                                                                      | "  |
|                        |                         | Antimalarial                                                                                                                                                    |    |
| Bipolarin F (72)       | "                       | Antibiotic and antifungal                                                                                                                                       | "  |
| Bipolarin G (73)       | "                       | Not Reported                                                                                                                                                    | "  |
| Bipolarin H (74)       | "                       | "                                                                                                                                                               | "  |
| Bipolaricins A (75)    | <i>Bipolaris</i> sp.    | Not reported                                                                                                                                                    | 86 |
| Bipolaricins B (76)    | "                       | Inhibition of HMG-CoA                                                                                                                                           | "  |
| Bipolaricins C (77)    | "                       | "                                                                                                                                                               | "  |
| Bipolaricins D (78)    | "                       | Not reported                                                                                                                                                    | "  |
| Bipolaricins E (79)    | "                       | "                                                                                                                                                               | "  |
| Bipolaricins F (80)    | "                       | "                                                                                                                                                               | "  |
| Bipolaricins G (81)    | "                       | "                                                                                                                                                               | "  |
| Bipolaricins H (82)    | "                       | "                                                                                                                                                               | "  |
| Bipolaricins I (83)    | "                       | "                                                                                                                                                               | "  |
| Asperophiobolin A (84) | <i>Aspergillus</i> sp.  | Not Reported                                                                                                                                                    | 87 |
| Asperophiobolin B (85) | "                       | "                                                                                                                                                               | "  |
| Asperophiobolin C (86) | "                       | "                                                                                                                                                               | "  |
| Asperophiobolin D (87) | "                       | "                                                                                                                                                               | "  |
| Asperophiobolin E (88) | "                       | "                                                                                                                                                               | "  |
| Asperophiobolin F (89) | "                       | "                                                                                                                                                               | "  |
| Asperophiobolin G (90) | "                       | "                                                                                                                                                               | "  |
| Asperophiobolin H (91) | "                       | Inhibition of lipopolysaccharide (LPS)-<br>induced nitric oxide production<br>Inhibition of <i>Mycobacterium tuberculosis</i> protein tyrosine<br>phosphatase B | "  |
| Asperophiobolin I (92) | "                       | Inhibition of lipopolysaccharide (LPS)-<br>induced nitric oxide production                                                                                      | "  |
| Asperophiobolin J (93) | "                       | "                                                                                                                                                               | "  |
| Asperophiobolin K (94) | "                       | Not reported                                                                                                                                                    | "  |
| Bipolarolide A (95)    | <i>Bipolaris</i> sp.    | Inhibition of HMG-CoA reductase                                                                                                                                 | 88 |
| Bipolarolide B (96)    | "                       | Not reported                                                                                                                                                    | "  |
| Bipolarolide C (97)    | "                       | Not reported                                                                                                                                                    | "  |
| Bipolarolide D (98)    | "                       | Not reported                                                                                                                                                    | "  |
| Bipolarolide E (99)    | "                       | Not reported                                                                                                                                                    | "  |
| Bipolarolide F (100)   |                         | Antifungal                                                                                                                                                      |    |
| Bipolarolide G (101)   | "                       | Not reported                                                                                                                                                    | "  |
| Ophiobotriol (102)     | "                       | "                                                                                                                                                               | "  |
| Drophiobiolin A (103)  | <i>D. gigantea</i>      | Phytotoxic<br>Cytotoxic                                                                                                                                         | 90 |
| Drophiobiolin B (104)  | "                       | "                                                                                                                                                               | "  |
| Maydispenoid A (105)   | <i>Bipolaris maydis</i> | Inhibitory activity of monoclonal<br>antibodies<br>Suppression murine splenocytes<br>proliferation                                                              | 91 |

---

**Table 2** Spheropsidin A and its natural analogs “: identical data to the entry immediately above)

| Compound                                                      | Fungal producer               | Activity                                           | Ref.       |
|---------------------------------------------------------------|-------------------------------|----------------------------------------------------|------------|
| Saphaeropsidin A (2, SphA)                                    | <i>Diplodia cupressi</i>      | Phytotoxic                                         | 115        |
|                                                               | <i>Aspergillus chevalieri</i> | Antibiotic                                         | 114        |
|                                                               | <i>Tubercularia sp. TF5</i>   | Not reported                                       | 118        |
|                                                               | <i>Smardaea sp.</i>           | Cytotoxicity and inhibition (MDA-MB-231) migration | 119        |
|                                                               | <i>Diplodia africana</i>      | Phytotoxic                                         | 121        |
|                                                               | <i>Aspergillus sp.</i>        | Cytotoxicity                                       | 173        |
|                                                               | <i>Diplodia quercivora</i>    | Phytotoxic, antifungal, zootoxic                   | 125        |
|                                                               | <i>Diplodia corticola</i>     | Not reported                                       | 131        |
|                                                               | <i>Botryospheria loricina</i> | Induction of quinone reductase                     | 133        |
|                                                               | <i>Aspergillus candida</i>    | Cytotoxic                                          | 134        |
|                                                               | <i>Diplodia olivarum</i>      | Phytotoxic and antifungal                          | 135        |
|                                                               | <i>Diplodia globulosa</i>     | Phytotoxic, antifungal, zootoxic                   | 136        |
|                                                               | Sphearopsidin B (135)         | <i>D. cupressi</i>                                 | Phytotoxic |
| <i>Aspergillus chevalieri</i>                                 |                               | Antibiotic                                         | 114        |
| <i>Tubercularia sp. TF5</i>                                   |                               | Not reported                                       | 118        |
| <i>B. loricina</i>                                            |                               | Induction of quinone reductase                     | 133        |
| Sphearopsidin C (136)                                         | <i>D. cupressi</i>            | Phytotoxicity                                      | 112        |
|                                                               | <i>D. quercivora</i>          | Phytotoxic, antifungal, zootoxic                   | 124        |
|                                                               | <i>D. olivarum</i>            | No activity                                        | 135        |
|                                                               | <i>D. globulosa</i>           | No activity                                        | 136        |
| Sphearopsidin D (137)                                         | <i>D. cupressi</i>            | Phytotoxic                                         | 112        |
| Sphearopsidin E (138)                                         | <i>D. cupressi</i>            |                                                    | 112        |
| Sphearopsidin F (139)                                         | <i>D. cupressi</i>            |                                                    | 112        |
| Diplopyrmarane (140)                                          | <i>D. quercivora</i>          | Phytotoxic, antifungal, zootoxic                   | 125        |
| Sphearopsidin G (141)                                         | <i>D. corticola</i>           | Zootoxic                                           | 132        |
|                                                               | <i>D. olivarum</i>            | “                                                  | 135        |
| 16-O- $\alpha$ -D-Tetraacetylglucopyranosyl hymatoxin C (142) | <i>Tubercularia sp.</i>       | Not reported                                       | 118        |
| Xylopimarane (143)                                            | <i>Xylaria sp.</i>            | Cytotoxic                                          | 173        |
| Aspergiloid E (144)                                           | <i>Aspergillus sp.</i>        | Cytotoxic                                          | 122        |
|                                                               | <i>Aspergillus porosus</i>    | “                                                  | 174        |
| Aspewentin A (145)                                            | <i>Aspergillus wentii</i>     | Zootoxic                                           | 175        |
|                                                               |                               | Antibiotic                                         | 176        |
| Aspewentin B (146)                                            | “                             | Zootoxic                                           | 175        |
| Aspewentin C (147)                                            | “                             | “                                                  | “          |
| Aspewentins D (148)                                           | “                             | Antibiotic and antifungal                          | 176        |
| Aspewentins E (149)                                           | “                             | Not reported                                       | “          |
| Aspewentins F (150)                                           | “                             | Antibiotic and antifungal                          | “          |
| Aspewentins G (151)                                           | “                             | “                                                  | “          |
| Aspewentins H (152)                                           | “                             | “                                                  | “          |
| Aspewentins I (153)                                           | “                             | Antibiotic                                         | 177        |
| Aspewentins J (154)                                           | “                             | “                                                  | “          |
| Aspewentins K (155)                                           | “                             | Not reported                                       | “          |
| Aspewentins I (156)                                           | “                             | “                                                  | “          |
| Aspewentins M (157)                                           | “                             | Antifungal                                         | “          |
| Aspewentins N (158)                                           | <i>Aspergillus sp.</i>        | Cytotoxic                                          | 178        |
| Aspewentins O (159)                                           | “                             | Not reported                                       | “          |
| Aspewentins P (160)                                           | “                             | Cytotoxic                                          | “          |
| Aspewentins Q (161)                                           | “                             | “                                                  | “          |
| Aspewentins R (162)                                           | “                             | Not Reported                                       | “          |
| Botryosphin A (163)                                           | <i>B. loricina</i>            | “                                                  | 133        |
| Botryosphin B (164)                                           | “                             | Induction of quinone reductase                     | “          |

|                      |                                  |                                     |     |
|----------------------|----------------------------------|-------------------------------------|-----|
| Botryosphin C (165)  | “                                | Not reported                        | “   |
| Botryosphin D (166)  | “                                | Induction of quinone reductase      | “   |
| Botryosphin E (167)  | “                                | Not reported                        | “   |
| Botryosphin F (168)  | “                                | “                                   | “   |
| Taichunin D (169)    | <i>Aspergillus taichungensis</i> | No Toxic                            | 180 |
| Botryosphins G (170) | <i>B. laricina</i>               | NO inhibition and quinone reductase | 179 |
| Botryosphins H (171) | “                                | “                                   | “   |
| Botryosphins I (172) | “                                | Not reported                        | “   |

---
